# Supplementary material for: Modulation of nucleation and crystallization in PbI2 films promoting preferential perovskite orientation growth for efficient solar cells
Source: Royal Society of Chemistry journal article supplement (doi:10.1039/d2ee03342a), 2022-12-09
Supplement: d2ee03342a1.pdf [file d2ee03342a1.pdf]

## Supporting Information

### **Modulation of Nucleation and Crystallization in PbI<sub>2</sub> Films Promoting Preferential Perovskite Orientation Growth for Efficient Solar Cells**

Wenlong Shao,<sup>a,b</sup> Haibing Wang,<sup>a</sup> Feihong Ye,<sup>a</sup> Cheng Wang,<sup>a</sup> Chen Wang,<sup>a</sup> Hongsen Cui,<sup>a</sup> Kailian Dong,<sup>a</sup> Yansong Ge,<sup>a</sup> Ti Wang,<sup>a</sup> Weijun Ke,<sup>\*a,b</sup> Guojia Fang<sup>\*a,b</sup>

a. Key Laboratory of Artificial Micro- and Nano-structures of Ministry of Education of China, School of Physics and Technology, Wuhan University, Wuhan 430072, China

E-mail: weijun.ke@whu.edu.cn (W. Ke); gjfang@whu.edu.cn (G. Fang)

b. Shenzhen Institute, Wuhan University, Shenzhen 518055, China

\* Corresponding author

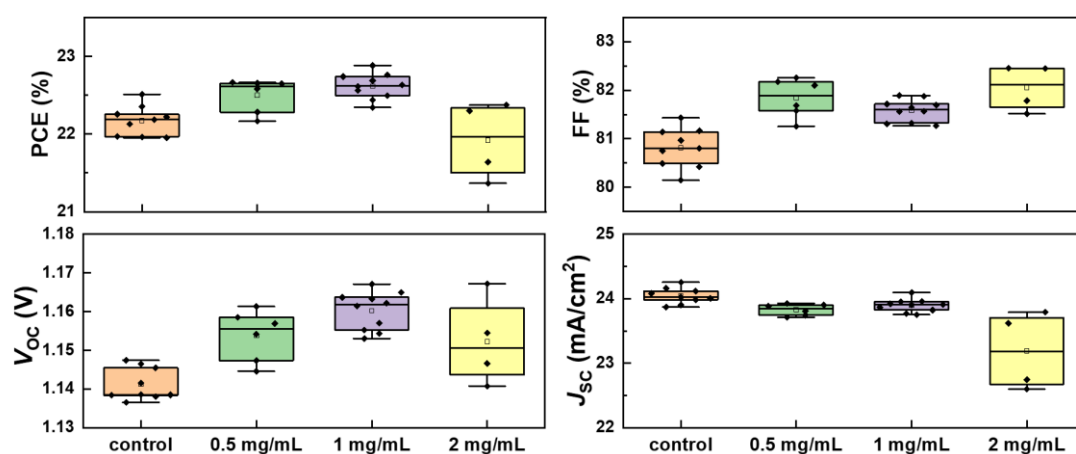

**Figure S1.** Statistical distribution of  $J$ - $V$  parameters of devices containing 0 (control), 0.5, 1, and 2 mg/mL of PFAT.

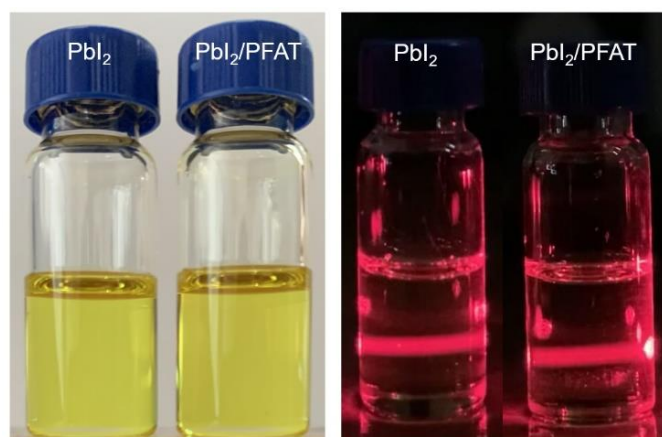

**Figure S2.**  $\text{PbI}_2$  solutions in DMF/DMSO (950/50, volume) w/o and with PFAT, and the corresponding Tyndall effect optical images.

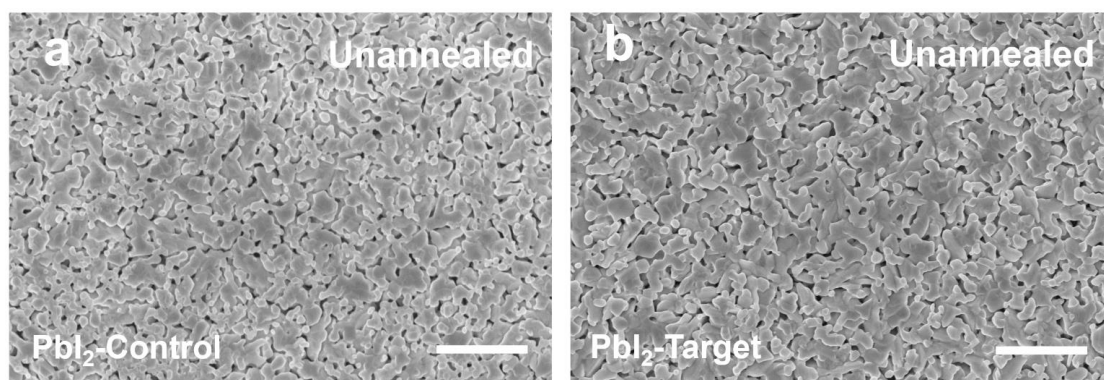

**Figure S3.** Top-view SEM images of the a)  $\text{PbI}_2$ -Control and b)  $\text{PbI}_2$ -Target unannealed films deposited on ITO/ $\text{SnO}_2$  substrates. The scale bars represent  $1\mu\text{m}$ .

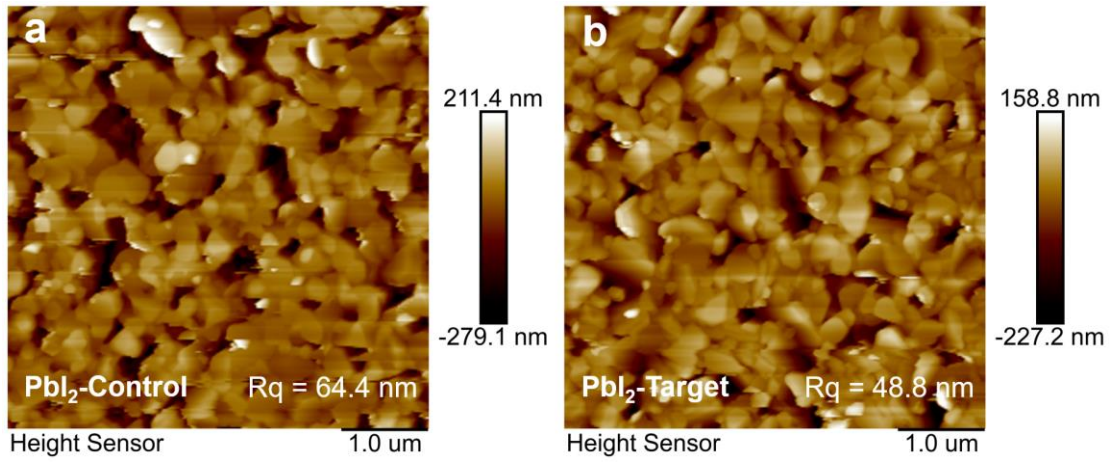

**Figure S4.** AFM 2D images of the a)  $\text{PbI}_2$ -Control and b)  $\text{PbI}_2$ -Target unannealed films deposited on ITO/ $\text{SnO}_2$  substrates.

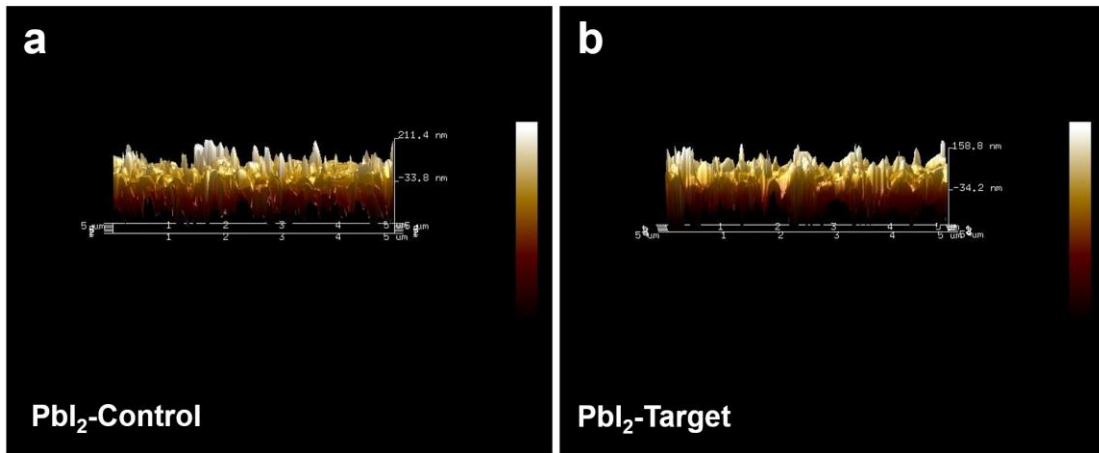

**Figure S5.** AFM 3D images of the a)  $\text{PbI}_2$ -Control and b)  $\text{PbI}_2$ -Target unannealed films deposited on ITO/ $\text{SnO}_2$  substrates.

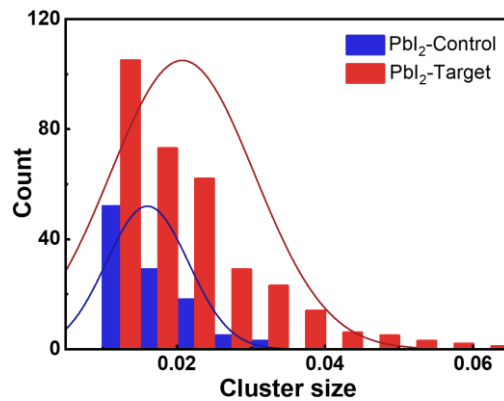

**Figure S6.** The statistics of cluster sizes in the  $\text{PbI}_2$ -Control and  $\text{PbI}_2$ -Target films from the top-view SEM images.

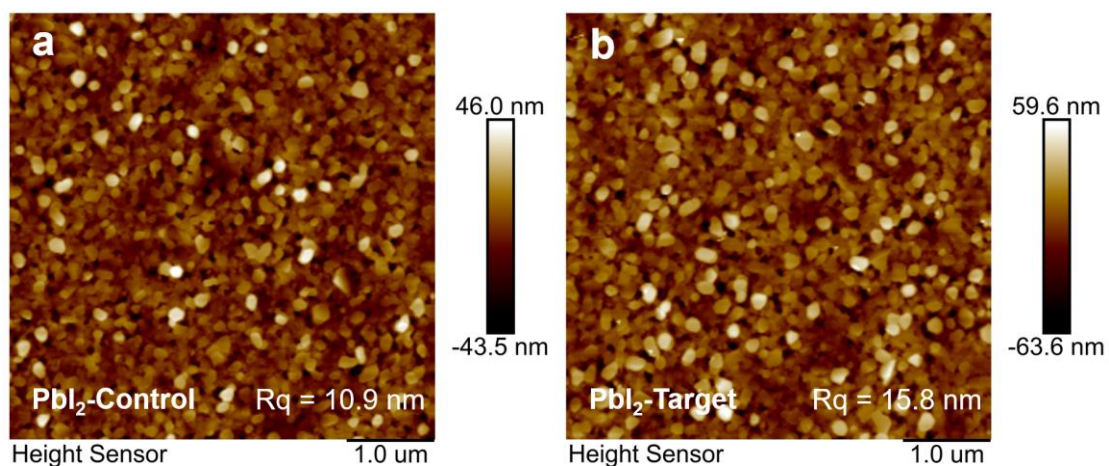

**Figure S7.** AFM images of the a)  $\text{PbI}_2$ -Control and b)  $\text{PbI}_2$ -Target annealed films deposited on ITO/ $\text{SnO}_2$  substrates.

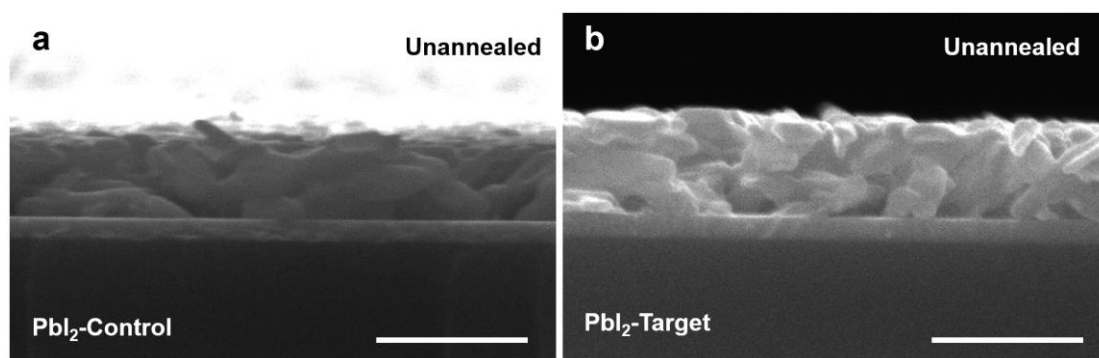

**Figure S8.** Cross-sectional SEM images of the a)  $\text{PbI}_2$ -Control and b)  $\text{PbI}_2$ -Target unannealed films deposited on ITO/ $\text{SnO}_2$  substrates. The scale bars represent  $1\ \mu\text{m}$ .

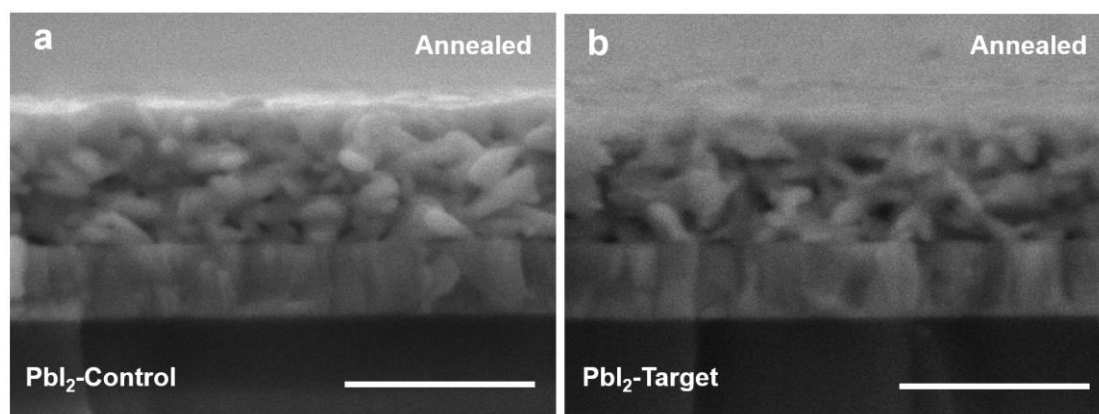

**Figure S9.** Cross-sectional SEM images of the a)  $\text{PbI}_2$ -Control and b)  $\text{PbI}_2$ -Target annealed films deposited on ITO/ $\text{SnO}_2$  substrates. The scale bars represent  $500\ \text{nm}$ .

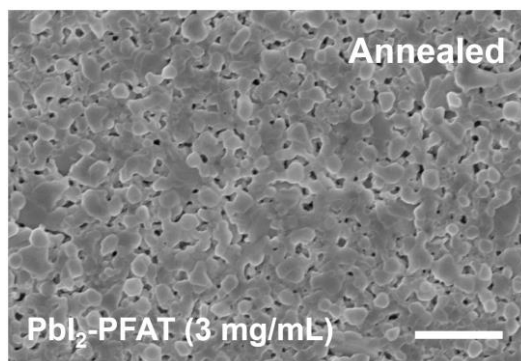

**Figure S10.** Top-view SEM image of a PbI<sub>2</sub>-PFAT (3 mg/mL) annealed film deposited on an ITO/SnO<sub>2</sub> substrate. The scale bar represents 1 μm.

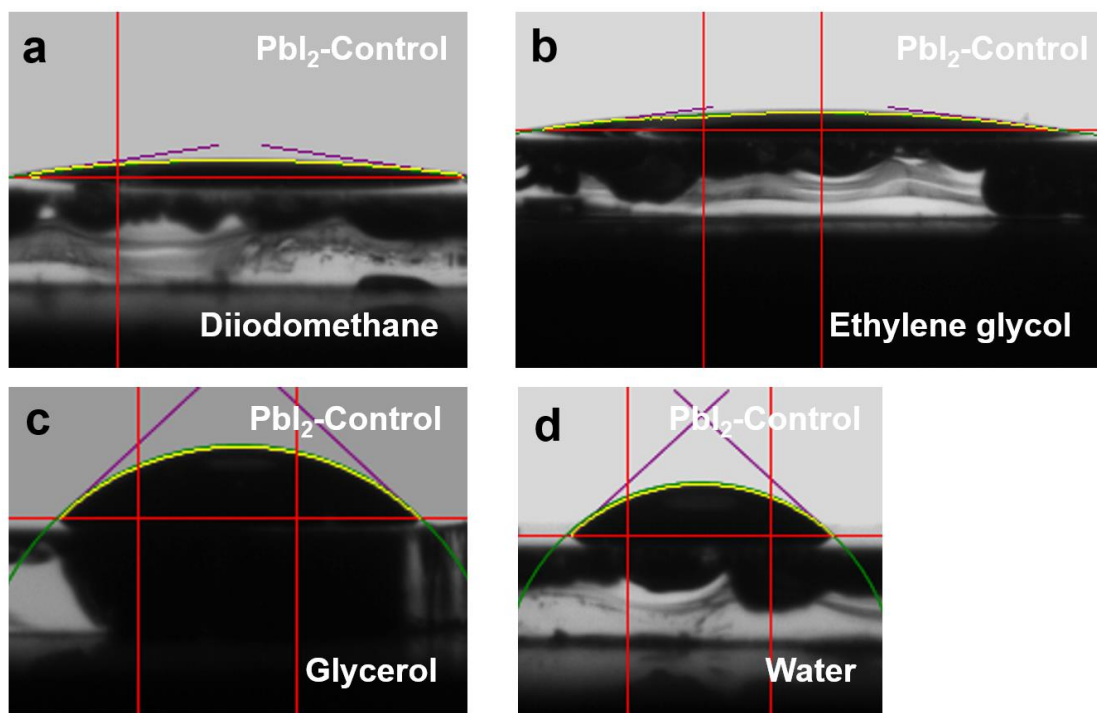

**Figure S11.** Contact angles of the PbI<sub>2</sub>-Control films with a) diiodomethane, b) ethylene glycol, c) glycerol, and d) water solution droplets.



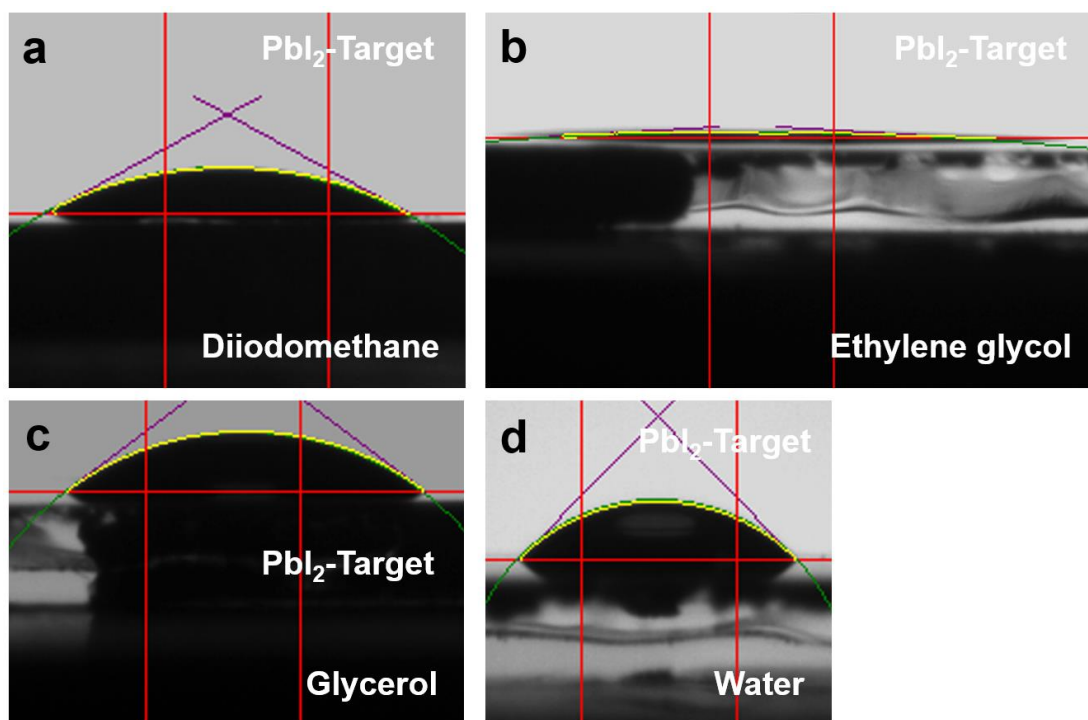

**Figure S12.** Contact angles of the  $\text{PbI}_2$ -Target films with a) diiodomethane, b) ethylene glycol, c) glycerol, and d) water solution droplets.

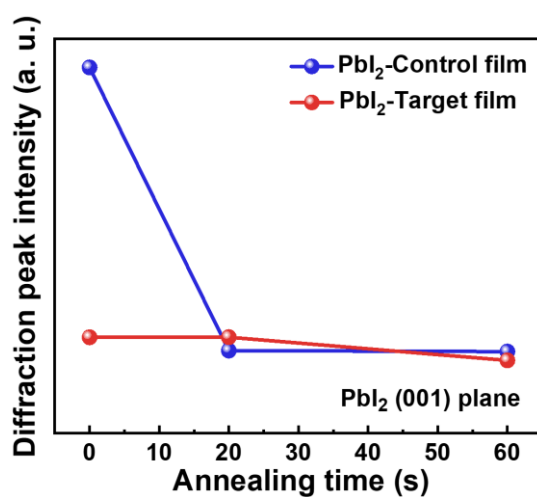

**Figure S13.** Evolution of diffraction peak intensity for (001) planes of different  $\text{PbI}_2$  films with various annealing times.

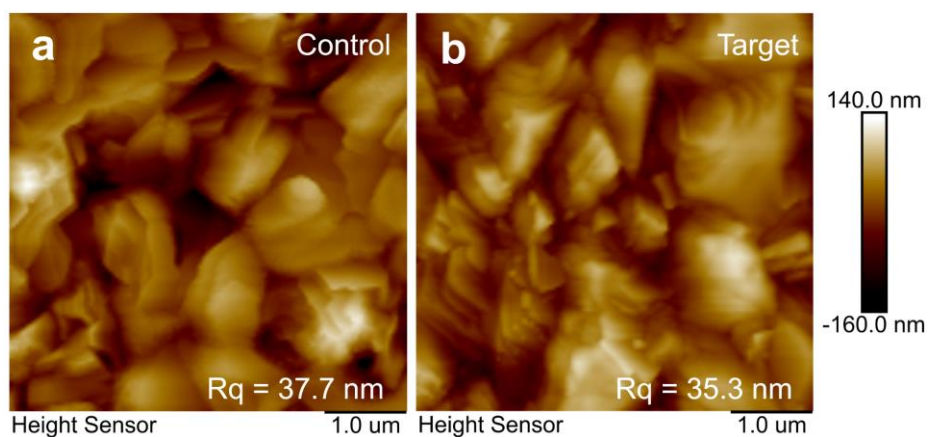

**Figure S14.** AFM images of the perovskite films a) without and b) with PFAT incorporation.

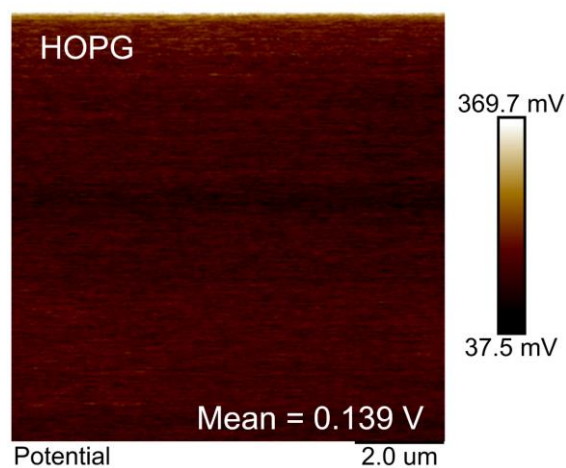

**Figure S15.** KPFM image of a highly oriented pyrolytic graphite (HOPG) as a standard sample.

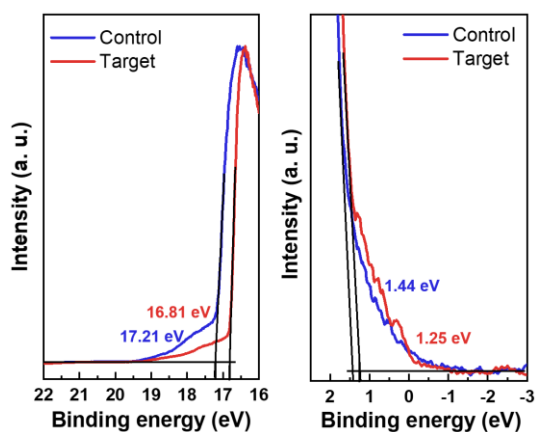

**Figure S16.** UPS spectra in the secondary electron cut-off regions (left) and valence band (VB) regions (right) of the control and target perovskite films. The laser energy source was He I (21.22 eV) for excitation.

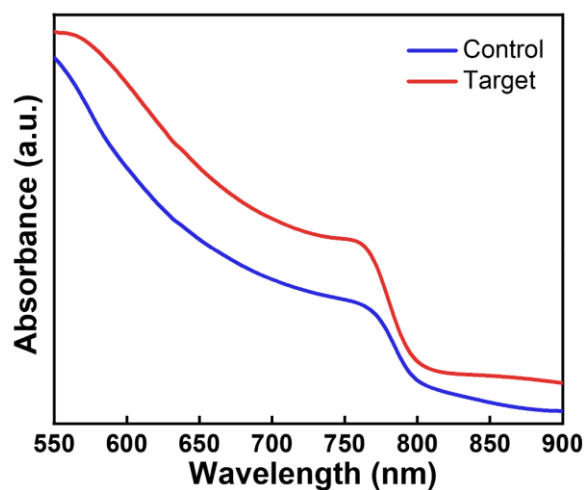

**Figure S17.** UV-vis absorbance spectra of the control and target perovskite films deposited on glass substrates.

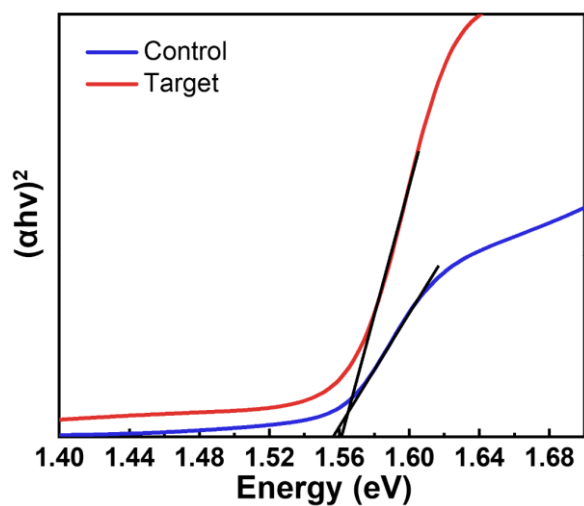

**Figure S18.** Tauc plots and measured bandgaps of the control and target perovskite films.

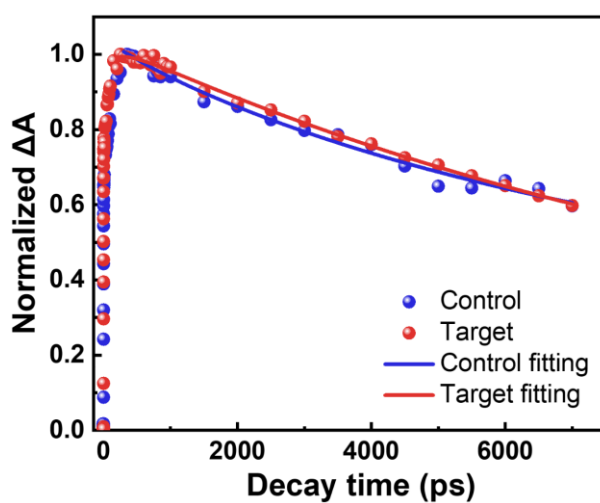

**Figure S19.** Normalized bleaching kinetics for different perovskite films.



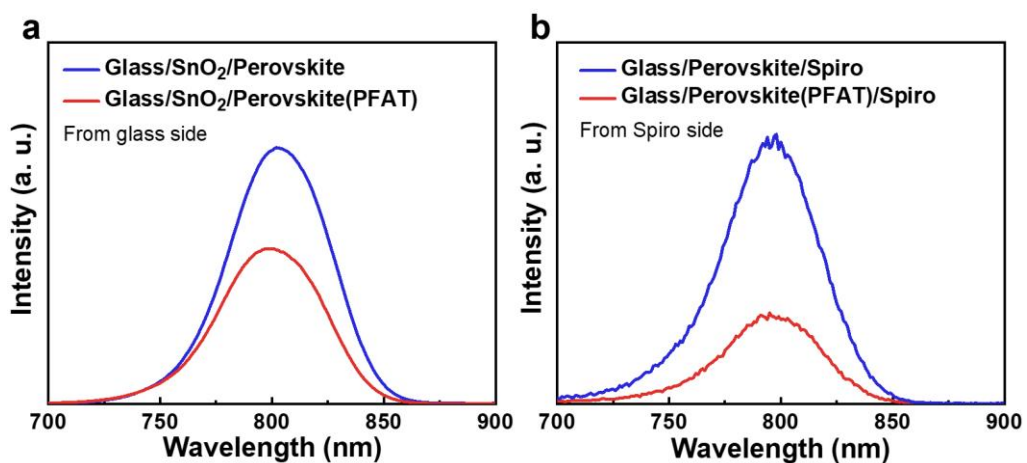

**Figure S20.** PL spectra of different perovskite films in the a) glass/SnO<sub>2</sub>/perovskite and b) glass/perovskite/spiro-OMeTAD configurations.

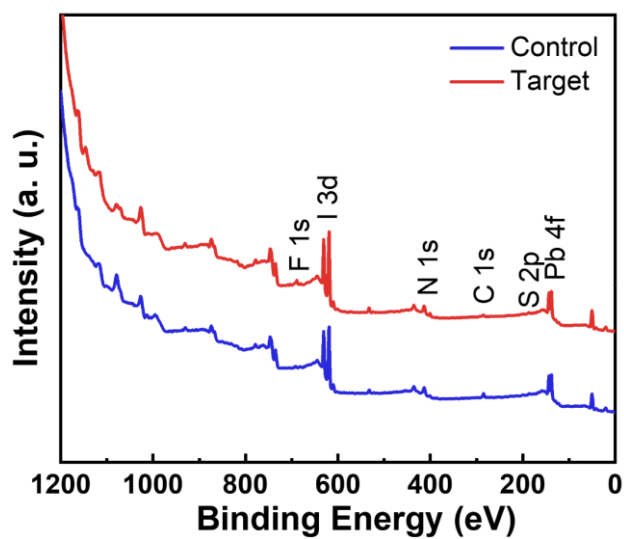

**Figure S21.** XPS full spectra of different perovskite films.

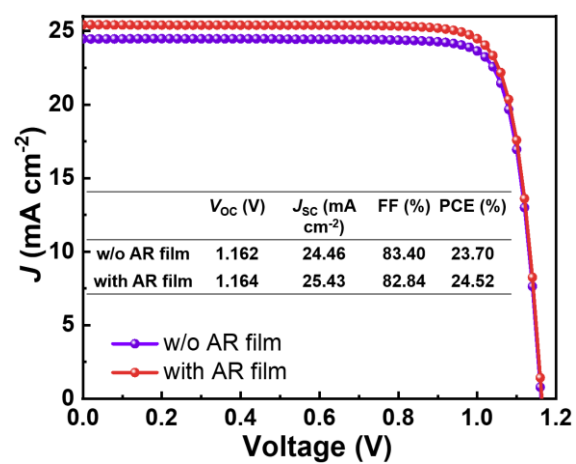

**Figure S22.** Comparison of photovoltaic parameters of the best-performing target device measured with reverse-scan without (w/o) and with a PDMS antireflective (AR) film.

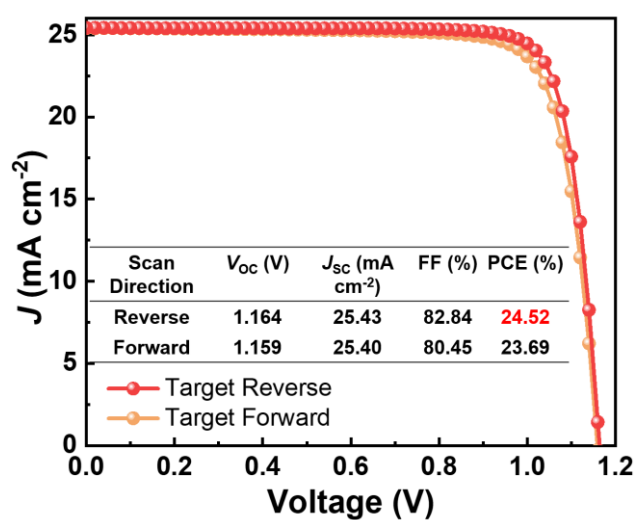

**Figure S23.** Reverse and forward-scanned  $J$ - $V$  curves of the best-performing target device with a PDMS antireflective film.

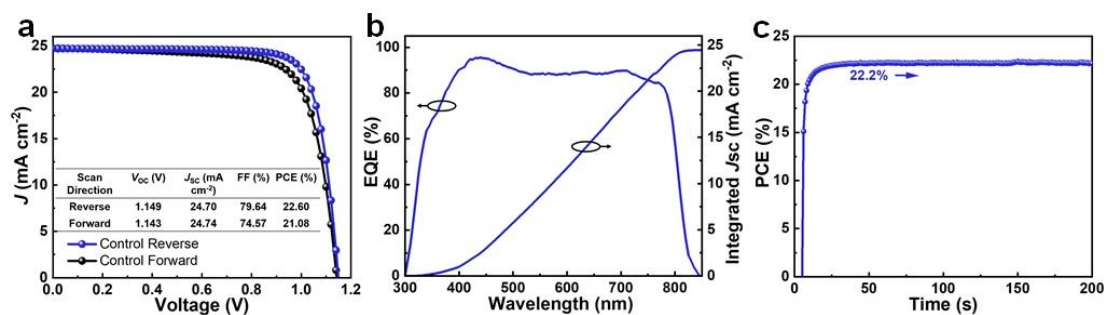

**Figure S24.** a) Reverse and forward-scanned  $J$ - $V$  curves of the best-performing control device. b) EQE spectrum and integrated curve of the best-performing control cell. The integrated  $J_{sc}$  is 24.46 mA/cm<sup>2</sup>. c) SPO test of the best-performing control device measured at a constant bias voltage of 0.94 V within 200 s. The steady-state PCE is ~22.2%.

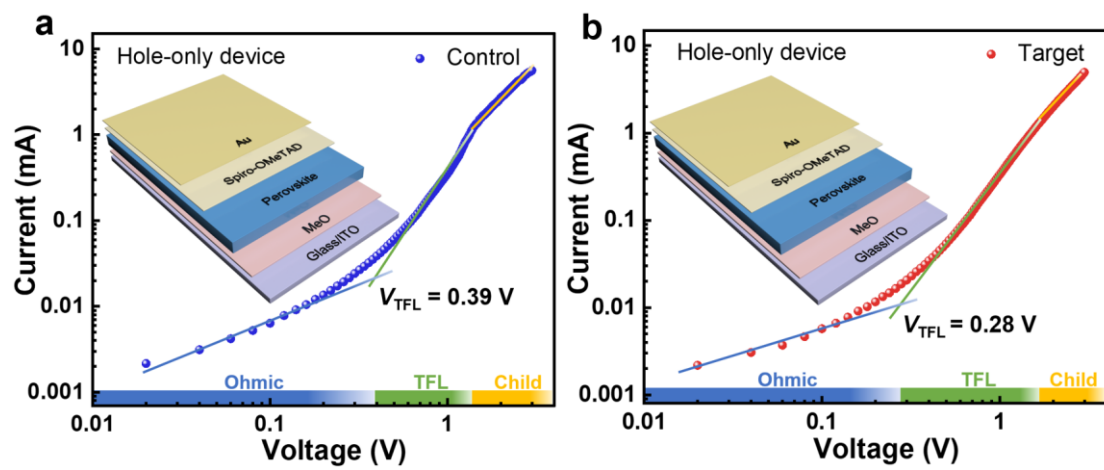

Figure S25. SCLC measurements for the hole-only a) control and b) target devices.

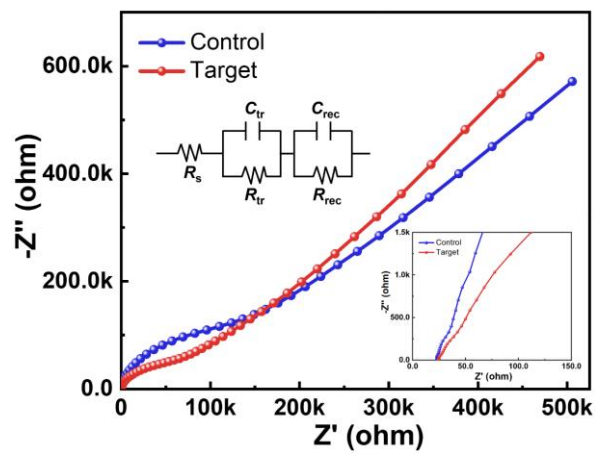

Figure S26. Nyquist plots of the control and target PSCs.

**Table S1.** Surface tension and contact angles between the standard liquids and the PbI<sub>2</sub> films without or with PFAT.

| Liquid (L)                          | Surface Tension (mN/m) |                         |                    | Contact angle $\theta$ (°) | x    | y      | m     | c     |
|-------------------------------------|------------------------|-------------------------|--------------------|----------------------------|------|--------|-------|-------|
|                                     | Total $\sigma$         | Dispersive $\sigma_L^d$ | Polar $\sigma_L^p$ |                            |      |        |       |       |
| <b>PbI<sub>2</sub>-Control film</b> |                        |                         |                    |                            |      |        |       |       |
| Diiodomethane                       | 50.8                   | 50.8                    | 0                  | 8.64                       | 0    | 7.088  | 4.215 | 6.488 |
| Ethylene glycol                     | 48                     | 29                      | 19                 | 7.649                      | 0.81 | 8.874  |       |       |
| Glycerol                            | 63.3                   | 20.22                   | 43.08              | 43.206                     | 1.46 | 12.170 |       |       |
| Water                               | 72.3                   | 18.7                    | 53.6               | 42.5                       | 1.69 | 14.520 |       |       |
| <b>PbI<sub>2</sub>-Target film</b>  |                        |                         |                    |                            |      |        |       |       |
| Diiodomethane                       | 50.8                   | 50.8                    | 0                  | 28.59                      | 0    | 6.693  | 4.441 | 6.215 |
| Ethylene glycol                     | 48                     | 29                      | 19                 | 3.298                      | 0.81 | 8.905  |       |       |
| Glycerol                            | 63.3                   | 20.22                   | 43.08              | 37.073                     | 1.46 | 12.656 |       |       |
| Water                               | 72.3                   | 18.7                    | 53.6               | 45.687                     | 1.69 | 14.203 |       |       |

**Table S2.** The fitted data of time-resolved TA spectra for different perovskite films.

| Sample  | A <sub>1</sub> | $\tau_1$ [ps] | A <sub>2</sub> | $\tau_2$ [ps] |
|---------|----------------|---------------|----------------|---------------|
| Control | 2.56E-2        | 697.2         | 6.85E-1        | 7613.3        |
| Target  | -5.64E-2       | 259.6         | 9.39E-1        | 11293.4       |



**Table S3.** TRPL lifetime parameters of the control and target perovskite films fitted by a bi-exponential decay function of  $F(t) = A_1 \exp(-t/\tau_1) + A_2 \exp(-t/\tau_2) + \gamma_0$ .

| Sample  | $A_1$ [%] | $\tau_1$ [ns] | $A_2$ [%] | $\tau_2$ [ns] | $\tau_{ave}$ [ns] |
|---------|-----------|---------------|-----------|---------------|-------------------|
| Control | 5.26      | 213.23        | 94.74     | 1202.96       | 966.76            |
| Target  | 4.34      | 181.74        | 95.66     | 2357.98       | 1551.57           |

**Note S1.** Calculation of the total surface tension ( $\sigma$ ) of the PbI<sub>2</sub>-Control and PbI<sub>2</sub>-Target films.

The Owens-Wendt-Rabel-Kaelble (OWRK) model:

$$\frac{\sigma_L(1 + \cos \theta)}{2\sqrt{\sigma_L^d}} = \sqrt{\sigma^p} \sqrt{\frac{\sigma_L^p}{\sigma_L^d}} + \sqrt{\sigma^d}$$

therein  $y = \frac{\sigma_L(1 + \cos \theta)}{2\sqrt{\sigma_L^d}}$ ,  $x = \sqrt{\frac{\sigma_L^p}{\sigma_L^d}}$ , the slope  $m = \sqrt{\sigma^p}$ , and the intercept  $c = \sqrt{\sigma^d}$ . By fitting the line  $y$

$= m * x + c$ , we obtain  $\sqrt{\sigma^p}$  and  $\sqrt{\sigma^d}$ , then the total surface tension  $\sigma = \sigma^p + \sigma^d$ .

**Note S2.** Estimation of Fermi energy levels from KPFM data.

The data obtained from KPFM measurements is contact potential difference (CPD, i.e., the mean value here). When DC voltage ( $V_{dc}$ ) is applied to a sample, the relationship between the measured CPD and the work function ( $\Phi$ ) of the sample is  $V_{CPD} = (\Phi_{sample} - \Phi_{tip})/e$ . From Figure 2g, h and S15, we can list the following equations:

$$V_{CPD-HOPG} = (\Phi_{HOPG} - \Phi_{tip}) / e = 0.139 \text{ V},$$

$$V_{CPD-Control} = (\Phi_{Control} - \Phi_{tip}) / e = -0.367 \text{ V},$$

$$V_{CPD-Target} = (\Phi_{Target} - \Phi_{tip}) / e = -0.145 \text{ V},$$

then we obtain  $\Phi_{Control} - \Phi_{HOPG} = -0.506 \text{ eV}$ , and  $\Phi_{Target} - \Phi_{HOPG} = -0.284 \text{ eV}$ . Since  $\Phi_{HOPG} = 4.5 \text{ eV}$ ,

$\Phi_{Control} = 3.994 \text{ eV}$  and  $\Phi_{Target} = 4.216 \text{ eV}$  can be calculated.
